# Supplementary material
Source: PubMed Central journal article supplement (PMC6614007)

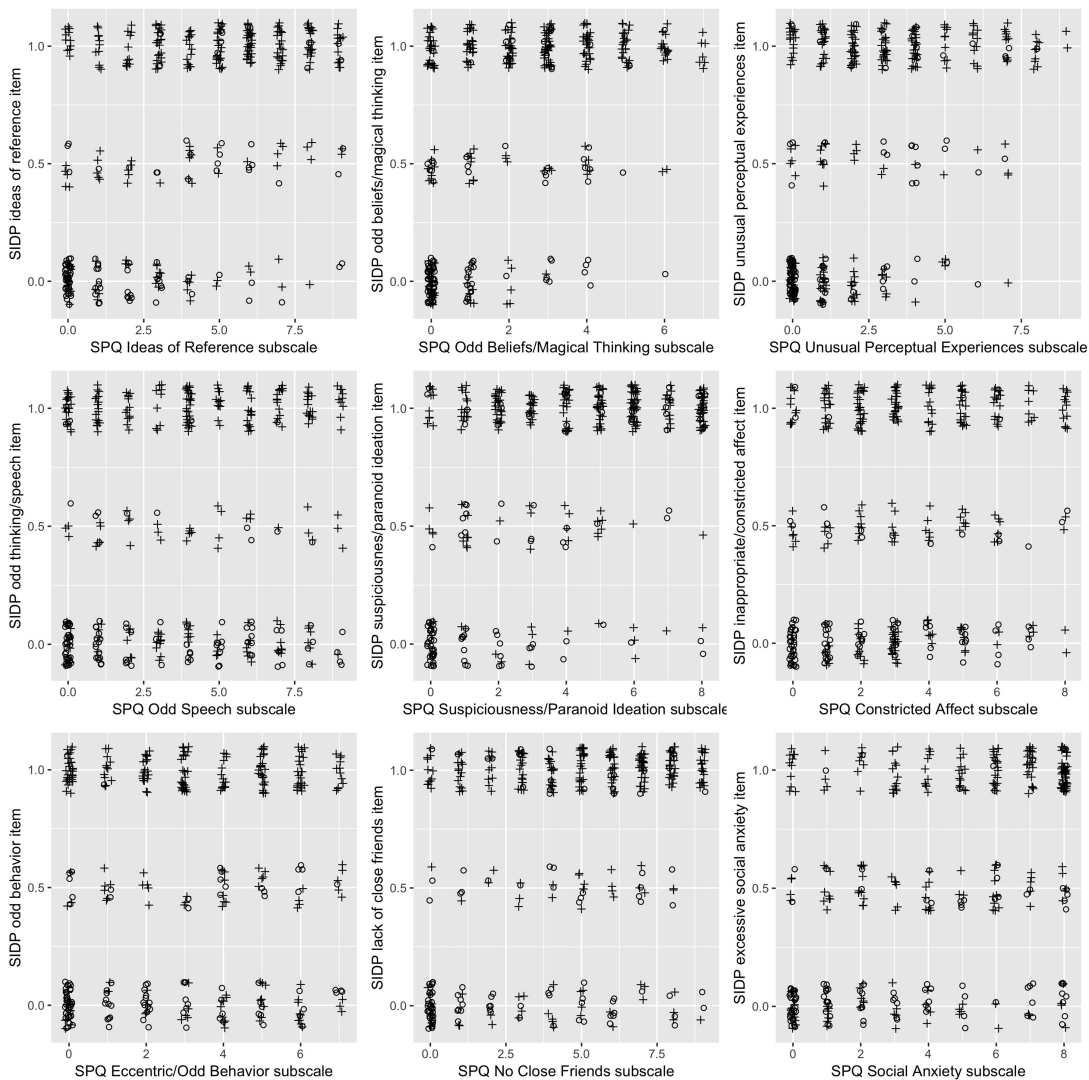

Supplementary Fig. 1.

Supplement: NIHMS1518276-supplement-1.pdf [file NIHMS1518276-supplement-1.pdf]
